1  
2  
3  
4  
5  
6  
7  
8  
9  
10  
11  
12  
13  
14  
15  
16  
17  
18  
19  
20  
21  
22  
23

Title: Perception of frequency modulation is mediated by cochlear place coding

Authors: Kelly L. Whiteford\*<sup>a</sup>, Heather A. Kreft<sup>a</sup>, and Andrew J. Oxenham<sup>a</sup>

<sup>a</sup>Department of Psychology, University of Minnesota, Minneapolis, MN 55455

\*Corresponding author: Department of Psychology, 75 East River Parkway, Minneapolis, MN 55455; Phone: 612-626-3258; Email: [whit1945@umn.edu](mailto:whit1945@umn.edu)

Keywords: Place coding, time coding, frequency modulation, sensorineural hearing loss

24 **Abstract**

25 Natural sounds convey information via frequency and amplitude modulations (FM and AM).

26 Humans are acutely sensitive to the slow rates of FM that are crucial for speech and music. Two

27 coding mechanisms are believed to underlie FM sensitivity, one based on precise stimulus-driven

28 spike timing (time code) for slow FM rates, and another coarser code based on cochlear place of

29 stimulation (place code) for fast FM rates. We tested this long-standing explanation by studying

30 individual differences in listeners with varying degrees of hearing loss that resulted in widely

31 varying fidelity of place-based or tonotopic coding. Our findings reveal that FM detection at both

32 slow and fast rates is closely related to the fidelity of place coding in the cochlea, suggesting a

33 unitary neural code for all FM rates. These insights into the initial coding of important sound

34 features provide a new impetus for improving place coding in auditory prostheses.

35

36

37 Modulations in frequency (FM) and amplitude (AM) carry critical information in biologically  
38 relevant sounds, such as speech, music, and animal vocalizations (Attias and Schreiner, 1997;  
39 Nelken et al., 1999). In humans, AM is crucial for understanding speech in quiet (Shannon et al.,  
40 1995; Smith et al., 2002), while FM is particularly important for perceiving melodies,  
41 recognizing talkers, determining speech prosody and emotion, and segregating speech from other  
42 competing background sounds (Zeng et al., 2005; Strelcyk and Dau, 2009; Sheft et al., 2012).  
43 The perception of FM is often degraded in older listeners and people with hearing loss (Lacher-  
44 Fougère and Demany, 1998; Moore and Skrodzka, 2002; He et al., 2007; Strelcyk and Dau,  
45 2009; Grose and Mamo, 2012; Paraouty et al., 2016; Wallaert et al., 2016; Paraouty and Lorenzi,  
46 2017; Whiteford et al., 2017). This deficit likely contributes to the communication difficulties  
47 experienced by such listeners in noisy real-world environments, which may in turn help explain  
48 why age-related hearing loss has been associated with decreased social engagement, greater rates  
49 of cognitive decline, and increased risk of dementia (Lin et al., 2011, 2013; Lin and Albert,  
50 2014; Deal et al., 2017; Thomson et al., 2017). Current assistive listening devices, such as  
51 hearing aids and cochlear implants, have been generally unsuccessful at reintroducing viable FM  
52 cues to the auditory system (Chen and Zeng, 2004; Ives et al., 2013). This lack of success is  
53 partly related to a gap in our scientific understanding regarding how FM is extracted by the brain  
54 from the information available in the auditory periphery.

55         The coding of AM begins in the auditory nerve with periodic increases and decreases in  
56 the instantaneous firing rate of auditory nerve fibers that mirror the fluctuations in the temporal  
57 envelope of the stimulus (Schreiner and Langner, 1988; Joris et al., 2004). As early as the  
58 inferior colliculus and extending to the auditory cortex, rapid AM rates are transformed to a code  
59 involving firing rate that is no longer time-locked to the stimulus envelope and instead relies on

60 overall firing rate, with different neurons displaying bandpass, lowpass, or highpass responses to  
61 different AM rates (Schreiner and Langner, 1988; Wang et al., 2008). The coding of FM is less  
62 straightforward. For a pure tone with FM, the temporal envelope of the stimulus is flat; however,  
63 the changes in frequency lead to dynamic shifts in the tone's tonotopic representation along the  
64 basilar membrane, resulting in a transformation of FM into AM at the level of the auditory nerve  
65 (Zwicker, 1956; Moore and Sek, 1995; Saberi and Hafter, 1995; Sek and Moore, 1995).

66         Although this FM-to-AM conversion provides a unified and neurally efficient code for  
67 both AM and FM based on periodic fluctuations in the instantaneous auditory-nerve firing rate in  
68 both cases (Saberi and Hafter, 1995), it falls short of explaining human behavioral trends in FM  
69 sensitivity, specifically at low carrier frequencies ( $f_c < \sim 4\text{-}5$  kHz) and slow modulation rates ( $f_m$   
70  $< \sim 10$  Hz), where sensitivity tends to be considerably better than at higher carrier frequencies or  
71 fast modulation rates (Demany and Semal, 1989; Moore and Sek, 1995; Sek and Moore, 1995;  
72 Moore and Sek, 1996; He et al., 2007; Whiteford and Oxenham, 2015; Whiteford et al., 2017).  
73 This discrepancy is important, because low frequencies and slow modulation rates are the most  
74 important for human communication, including speech and music, as well as animal  
75 vocalizations. The enhanced sensitivity to slow FM at low carrier frequencies has been explained  
76 in terms of an additional neural code based on stimulus-driven spike timing in the auditory nerve  
77 that is phase-locked to the temporal fine structure of the stimulus (Moore and Sek, 1995).  
78 Although such a time-based code can potentially provide greater accuracy (Siebert, 1970; Heinz  
79 et al., 2001), and is used for spatial localization (Moiseff and Konishi, 1981; Grothe et al., 2010),  
80 it is not known whether or how this timing information is extracted by higher stages of the  
81 auditory system to code periodicity and FM.

82           If the detection of FM at fast modulation rates depends on an FM-to-AM conversion,  
83    whereas the detection of FM at slow rates does not, then fast-rate FM detection thresholds should  
84    depend on the sharpness of cochlear tuning (Fig. 1), whereas slow-rate FM detection thresholds  
85    should not. Previous studies using normal-hearing listeners have not demonstrated such a  
86    relationship for either slow or fast FM rates (Whiteford and Oxenham, 2015; Whiteford et al.,  
87    2017). However, this failure to find a correlation may be due to lack of variability in cochlear  
88    filtering within a normal-hearing population. People with cochlear hearing loss often have poorer  
89    frequency selectivity (Glasberg and Moore, 1986; Moore et al., 1999), due to a broadening of  
90    cochlear tuning (Robertson and Manley, 1974; Liberman et al., 1986; Moore, 2007). In contrast,  
91    damage to the cochlea is not thought to lead to a degradation of auditory-nerve phase locking to  
92    temporal fine structure for sounds presented in quiet (Henry and Heinz, 2012), so we would not  
93    expect to find a strong relationship between slow-rate FM detection thresholds and hearing-loss-  
94    induced changes in cochlear tuning.

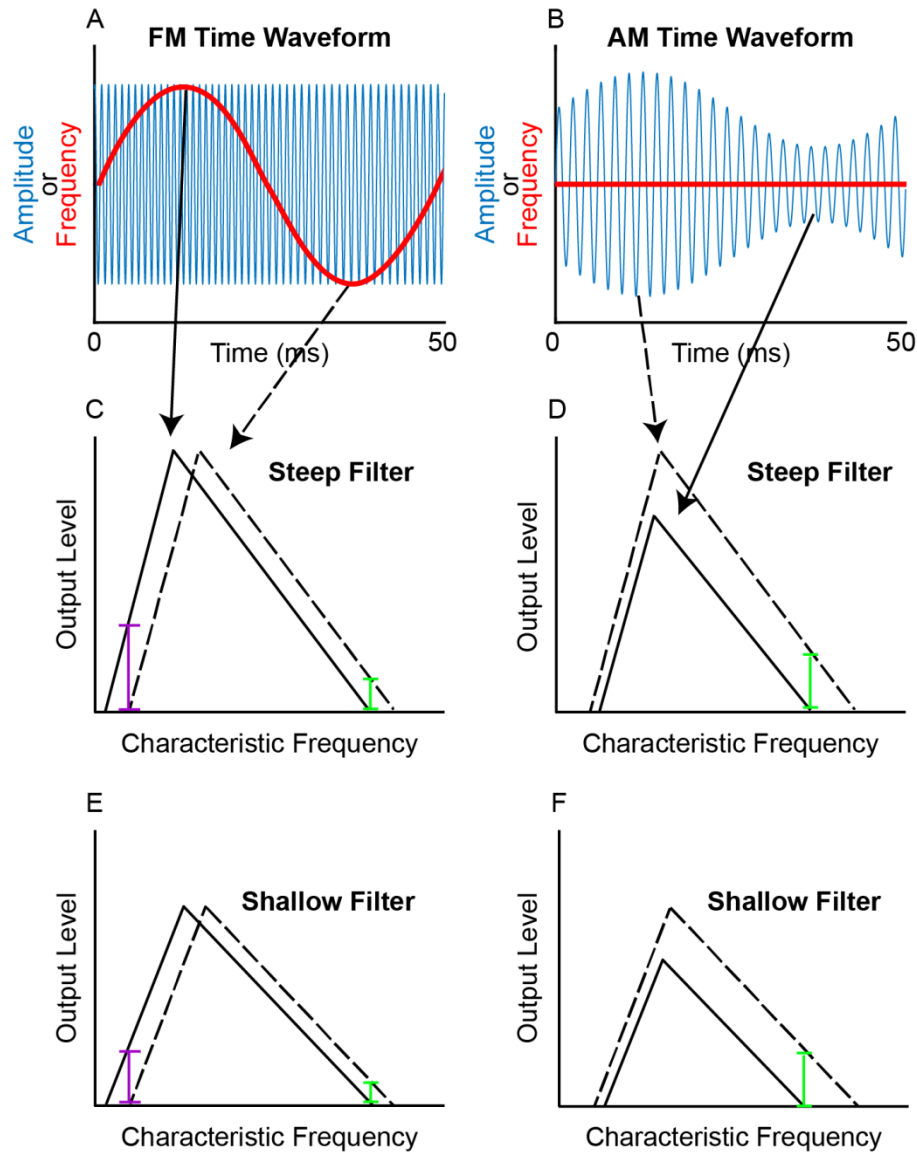

95

96 **Fig. 1.** Schematic of (A) FM and (B) AM time waveforms ( $f_c = 1$  kHz;  $f_m = 20$  Hz) and the  
97 resulting changes in basilar membrane excitation for people with (C & D) steep versus (E & F)  
98 shallow cochlear filters. In A and B, the blue time waveforms represent amplitude over time,  
99 while the superimposed red waveforms are the same stimuli plotted in frequency over time.  
100 Panels C and E demonstrate that a place code for FM would result in a greater change in output  
101 level on the low-frequency side of the excitation pattern (purple lines) relative to the high-  
102 frequency side (green lines).

103  
104           Here we measured FM and AM detection at slow ( $f_m = 1$  Hz) and fast ( $f_m = 20$  Hz)  
105 modulation rates in a large sample of listeners with hearing thresholds at the carrier frequency ( $f_c$   
106 = 1 kHz) ranging from normal (~0 dB sound pressure level, SPL) to severely impaired (~70 dB  
107 SPL), consistent with sensorineural hearing loss (SNHL). The fidelity of cochlear frequency  
108 tuning was assessed using a psychophysical method to estimate the steepness of the forward  
109 masking function around 1 kHz. The results revealed a relationship between the estimated  
110 sharpness of cochlear tuning and sensitivity to FM at both fast and slow modulation rates. This  
111 relationship remained significant even after controlling for degree of hearing loss, sensitivity to  
112 AM, and age. Our results suggest that the fidelity of coding of slow FM depends on the fidelity  
113 of cochlear filtering, as predicted by a unified theory of AM and FM coding, and that an  
114 additional neural timing code may not be necessary to explain human perception of FM.

115

## 116 **Results**

### 117 **Effects of hearing loss on masking functions.**

118           The fidelity of place coding at the test frequency (1 kHz) was measured using pure-tone  
119 forward-masking patterns. Participants heard two tones, one at a time, and were instructed to  
120 select the tone that had a short 20-ms tone pip directly following it. The masker tones were fixed  
121 in frequency (1 kHz) and level, while the tone pip level was adaptively varied to measure the  
122 lowest sound level that the participant could detect. Without the presence of a masker, the level  
123 of the tone pip reflects the absolute threshold (Supplementary Fig. 1, unfilled circles). In the  
124 presence of a pure-tone forward masker, the level of the tone pip depends on the tone pip's  
125 frequency proximity to the masker and the shape of the individual's cochlear filters, where

126 detection for tone pips close in frequency to the masker are much poorer (i.e., the level must be  
127 higher) than for tone pips farther away in frequency. For each participant, the steepness of the  
128 low- and high-frequency slopes of the masking function were estimated by calculating linear  
129 regressions between the thresholds for the four lowest (800, 860, 920, and 980 Hz) and highest  
130 tone pip frequencies (1020, 1080, 1140, and 1200 Hz), with tone pip frequency transformed to  
131 logarithmic units for the regression. Within-subject test-retest reliability of the estimated slope  
132 functions was high (bootstrapped simulated test-retest correlations of  $r = .98$  and  $r = .953$  for the  
133 low and high slopes, respectively; see Methods). The range of measured masking function slopes  
134 in the present study spanned 152 dB/octave for the low slope (-24 – 128 dB/octave;  $\bar{x} = 49.4$ ) and  
135 120 dB/octave for the high slope (-92.7 – 28.3 dB/octave; Fig. 2, y-axis;  $\bar{x} = -23.3$ ), which was  
136 much greater than that observed in a purely normal-hearing population at 500 Hz (Whiteford and  
137 Oxenham, 2015; Whiteford et al., 2017).

138 Consistent with expectations (Glasberg and Moore, 1986), the amount of hearing loss at  
139 the tone pip frequency correlated with the slopes of the masking functions (Fig. 2; low slope:  $r =$   
140  $-.685$ ,  $p < .0001$ , CI =  $-.804$ ,  $-.513$ ; high slope:  $r = .717$ ,  $p < .0001$ , CI =  $.559$ ,  $.826$ ), confirming  
141 that hearing loss is associated with poorer frequency tuning. However, frequency tuning is  
142 believed to be governed solely by basilar membrane mechanics and outer hair cell function  
143 (Moore, 2007), whereas overall hearing loss also includes contributions from other factors, such  
144 as the function of the inner hair cells and the auditory nerve. These additional factors may  
145 explain why filter slopes account for only approximately half the variance observed in absolute  
146 thresholds.

147



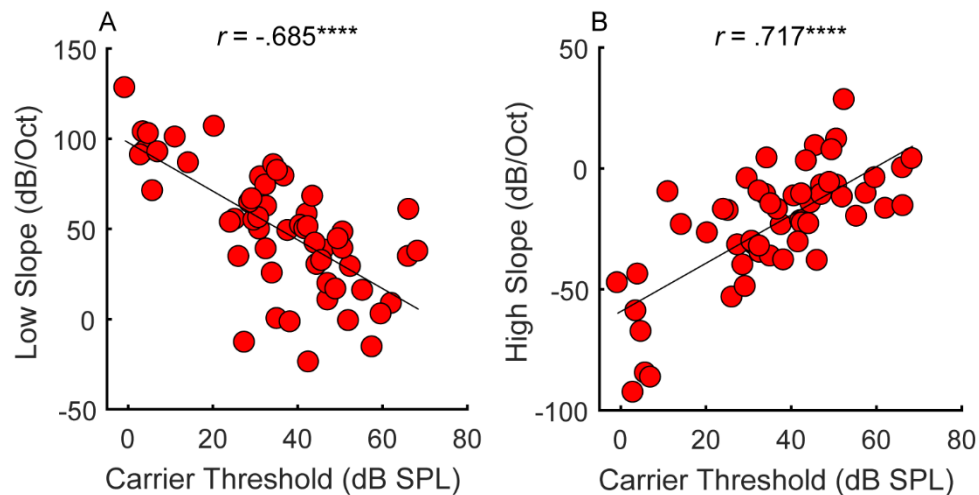

148

149 **Fig. 2.** Correlations between average absolute thresholds at 1 kHz (x-axis) and the steepness of  
150 the (A) low and (B) high side of the cochlear filter slopes (n=55). Participants with greater  
151 hearing loss at 1 kHz tended to have shallower filter slopes. Correlations marked with an \* are  
152 significant after Holm's correction (\*\*\*\* $p < .0001$ ).

153

#### 154 **Average FM and AM detection thresholds.**

155 When compared to earlier results from normal-hearing listeners varying in age  
156 (Whiteford et al., 2017), the range of FM detection thresholds, indicated by the upper and lower  
157 whiskers in Fig. 3A, was much wider in the present study, whereas the range of AM detection  
158 thresholds (Fig. 3B) was comparable. This result suggests that cochlear hearing loss may affect  
159 FM more than AM thresholds. For AM, thresholds were generally lower (better) for the high rate  
160 than for the low rate (slow AM:  $\bar{x} = -17.1$ ,  $s = 4.06$ ; fast AM:  $\bar{x} = -24.9$ ,  $s = 3.64$ ;  $t_{54} = 17.7$ ,  $p <$   
161  $.0001$ ,  $d_z = 2.39$ , CI = 6.98, 8.76), whereas the opposite trend was observed for FM (slow FM:  $\bar{x}$   
162  $= 2.16$ ,  $s = 3.24$ ; fast FM:  $\bar{x} = 2.69$ ,  $s = 2.72$ ;  $t_{54} = -2.15$ ,  $p = .018$ ,  $d_z = -.29$ , CI = -1.02, -.036),  
163 consistent with earlier studies (Viemeister, 1979; Sheft and Yost, 1990; Moore and Sek, 1995,

164 1996; Lacher-Fougère and Demany, 1998; Whiteford and Oxenham, 2015; Whiteford et al.,  
165 2017; Whiteford and Oxenham, 2017).  
166

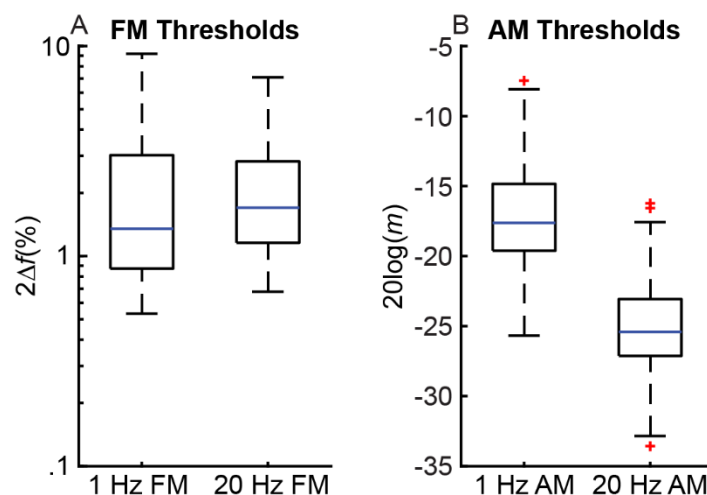

167  
168 **Fig. 3.** Boxplots of sensitivity to modulations in (A) frequency and (B) amplitude across 55  
169 listeners. The y-axes correspond to the smallest amount of modulation detectable at threshold,  
170 where lower represents better performance. Blue bars are the median of each group. Whiskers  
171 are the lowest and highest data points within 1.5 times the lower and higher inter-quartile ranges.  
172 Red crosses represent thresholds of individuals whose performance fell outside this range.

173

### 174 **Correlations between FM and AM detection.**

175 Test-retest reliability for the estimation of AM and FM detection thresholds was very  
176 high (average correlations using a bootstrapping procedure: slow FM,  $r = .973$ ,  $p < .0001$ , CI =  
177 .954, .984; fast FM,  $r = .97$ ,  $p < .0001$ , CI = .949, .983; slow AM,  $r = .925$ ,  $p < .0001$ , .874, .956;  
178 fast AM,  $r = .956$ ,  $p < .0001$ , CI = .925, .974; see Methods). If slow FM utilizes a time code, then  
179 across-listener variability in slow FM detection should partly reflect variability in time coding.  
180 This means that across-listener correlations in tasks known to use a shared code (fast FM, slow

181 AM, and fast AM) should be greater than in tasks thought to use different codes (slow FM with  
182 any other task). Inconsistent with this prediction, slow and fast FM detection thresholds were  
183 strongly correlated ( $r = .826, p < .0001, CI = .718, .895$ ), as were detection thresholds for slow  
184 and fast AM ( $r = .638, p < .0001, CI = .449, .773$ ) and fast FM and fast AM ( $r = .317, p = .018,$   
185  $CI = .057, .537$ ) (Fig. 4). The correlation between slow FM and slow AM was not significant ( $r =$   
186  $.199, p = .072, CI = -.07, .441$ ), but this correlation was not significantly different from the  
187 correlation between fast FM and fast AM ( $Z = -.906, p = .365$ , two-tailed). Even though  
188 participants in the present study varied widely in peripheral place coding fidelity (Fig. 2),  
189 correlational trends between FM and AM thresholds generally mirrored those observed in groups  
190 of listeners with normal hearing (Whiteford and Oxenham, 2015; Whiteford et al., 2017).  
191

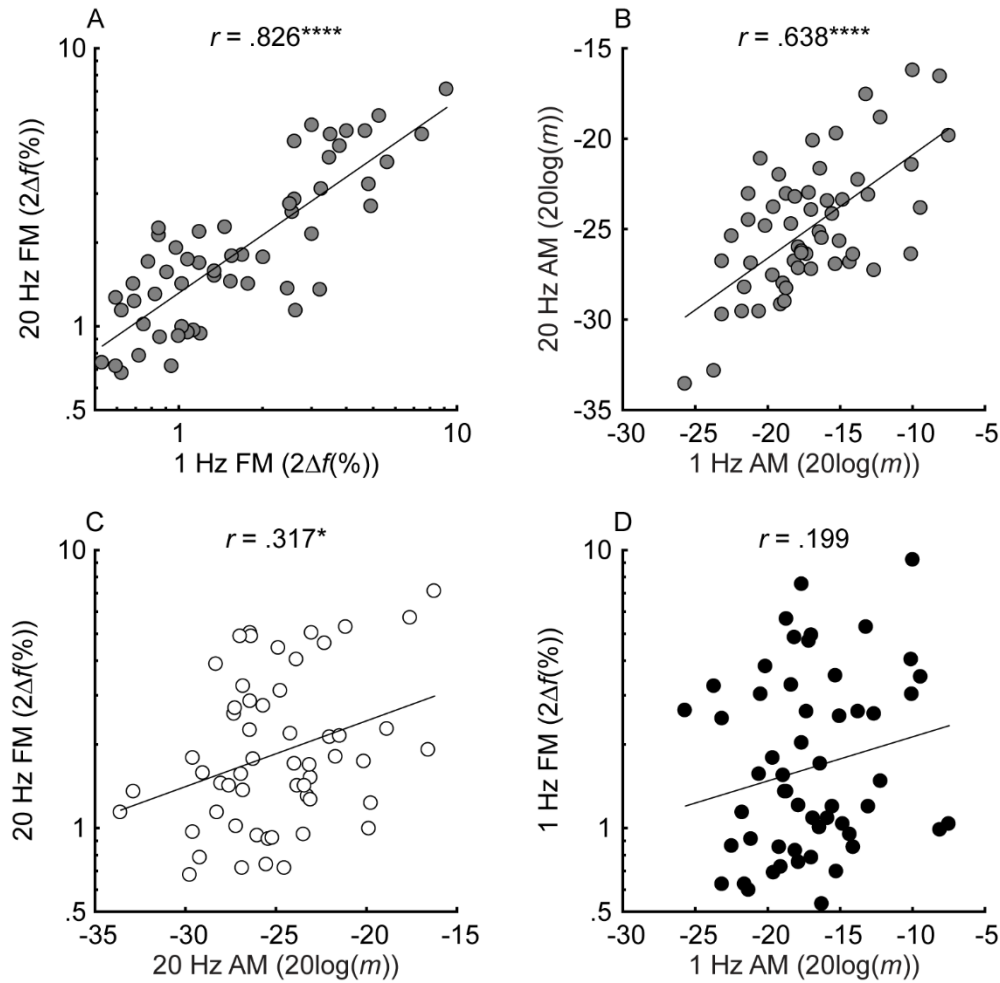

192

193 **Fig. 4.** Individual thresholds for slow ( $f_m = 1$  Hz; black) and fast ( $f_m = 20$  Hz; white) FM and AM

194 detection ( $n=55$ ). Grey circles represent different rates on the x- and y-axes. FM and AM

195 thresholds are plotted in percent peak-to-peak frequency change ( $2\Delta f(\%)$ ) and  $20\log(m)$ , where

196  $\Delta f$  is the frequency excursion from the carrier and  $m$  is the modulation depth (ranging from 0-1)).

197 For all tasks, lower on the x- or y-axis represents better thresholds. Correlations marked with an

198 \* are significant after Holm's correction (\*\*\*\* $p < .0001$ , \*\*\* $p < .001$ , \*\* $p < .01$ , and \* $p < .05$ ).

199

## 200 **The role of frequency selectivity in FM detection.**

201 The unitary neural coding theory of FM and AM predicts that steeper masking functions

202 (implying sharper cochlear tuning) should be related to better FM detection thresholds (Zwicker,

203 1956). The current consensus is that theory applies to fast but not slow FM detection (Moore and  
204 Sek, 1995, 1996; Lacher-Fougère and Demany, 1998; Strelcyk and Dau, 2009). Our results  
205 contradict this consensus by showing that both slow and fast FM detection were similarly  
206 strongly related to the masking function slopes (Fig. 5). Age and sensitivity to AM could  
207 confound effects of cochlear filtering because they are known to influence FM detection in  
208 listeners with normal hearing (Whiteford and Oxenham, 2015; Paraouty et al., 2016; Whiteford  
209 et al., 2017). Audibility is not thought to affect FM for levels that are 25 dB or more above  
210 absolute threshold (Zurek and Formby, 1981), but it was included as a precaution, since a few  
211 listeners with the most hearing loss had stimuli presented at or near 20 dB sensation level (SL),  
212 and because hearing loss has been postulated to affect time coding, independent of place coding  
213 (Ewert et al., 2018). Partial correlations between FM detection and masking function slopes were  
214 conducted, controlling for age, absolute thresholds at 1 kHz (task 1), and AM detection at the  
215 corresponding rate, thereby isolating the role of place coding in FM detection. The correlations  
216 between the residuals (Fig. 6) demonstrate a significant relation between the low slope and FM  
217 detection threshold at both rates (slow FM:  $r_p = -.364$ ,  $p = .016$ , CI =  $-.574$ ,  $-.109$ ; fast FM:  $r_p = -$   
218  $.377$ ,  $p = .015$ , CI =  $-.584$ ,  $-.124$ ) and no relation between the high slope and FM (slow FM:  $r_p =$   
219  $-.064$ ,  $p = .555$ , CI =  $-.323$ ,  $.205$ ; fast FM:  $r_p = -.084$ ,  $p = .555$ , CI =  $-.341$ ,  $.186$ ). Because the low  
220 slope of the masking function (reflecting the upper slopes of the cochlear filters) is generally  
221 steeper than the high slope, it provides more stimulus information relative to the high side (Fig.  
222 1, leftmost column), and is therefore predicted to dominate FM performance (Zwicker, 1956).  
223 Sensitivity to AM detection was not related to either the low slopes (slow AM:  $r = .058$ ,  $p >$   
224  $.499$ , CI =  $-.211$ ,  $.318$ ; fast AM:  $r = .277$ ,  $p = .076$ , CI =  $.013$ ,  $.505$ ) or high slopes (slow AM:  $r =$   
225  $.007$ ,  $p > .499$ , CI =  $-.259$ ,  $.272$ ; fast AM:  $r = -.281$ ,  $p = .076$ , CI =  $-.508$ ,  $-.017$ ) of the masking

226 functions, demonstrating that the relations between masking function slopes and modulation  
227 detection is specific to FM, as predicted by place coding. The results therefore provide strong  
228 support for the hypothesis that place coding is utilized for FM detection at both slow and fast  
229 rates. These conclusions were confirmed using multiple linear regression analyses (see  
230 Supplementary Text 1).  
231

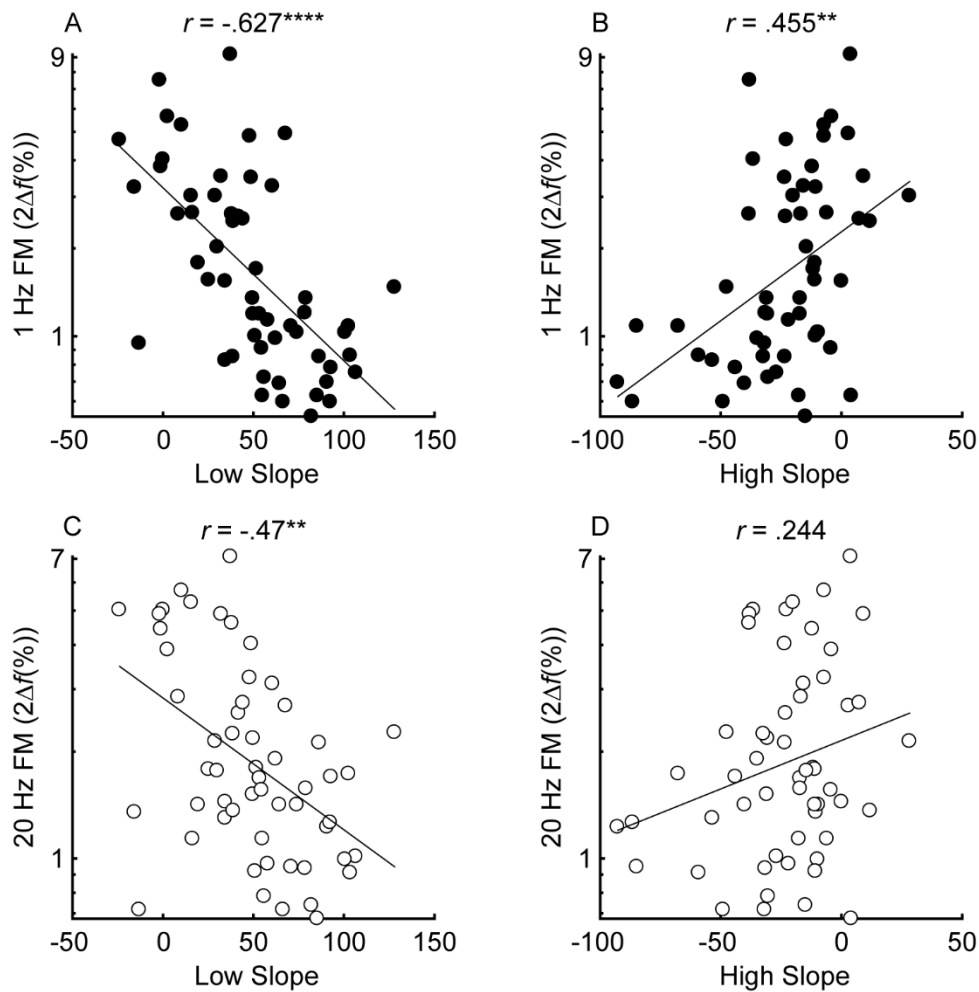

232  
233 **Fig. 5.** Correlations between the low slope (A and C) and high slope (B and D) and slow ( $f_m = 1$   
234 Hz; black) and fast ( $f_m = 20$  Hz; white) FM detection (n=55). Correlations marked with an \* are  
235 significant after Holm's correction (\*\*\*\* $p < .0001$ , \*\*\* $p < .001$ , \*\* $p < .01$ , and \* $p < .05$ ).

236

237

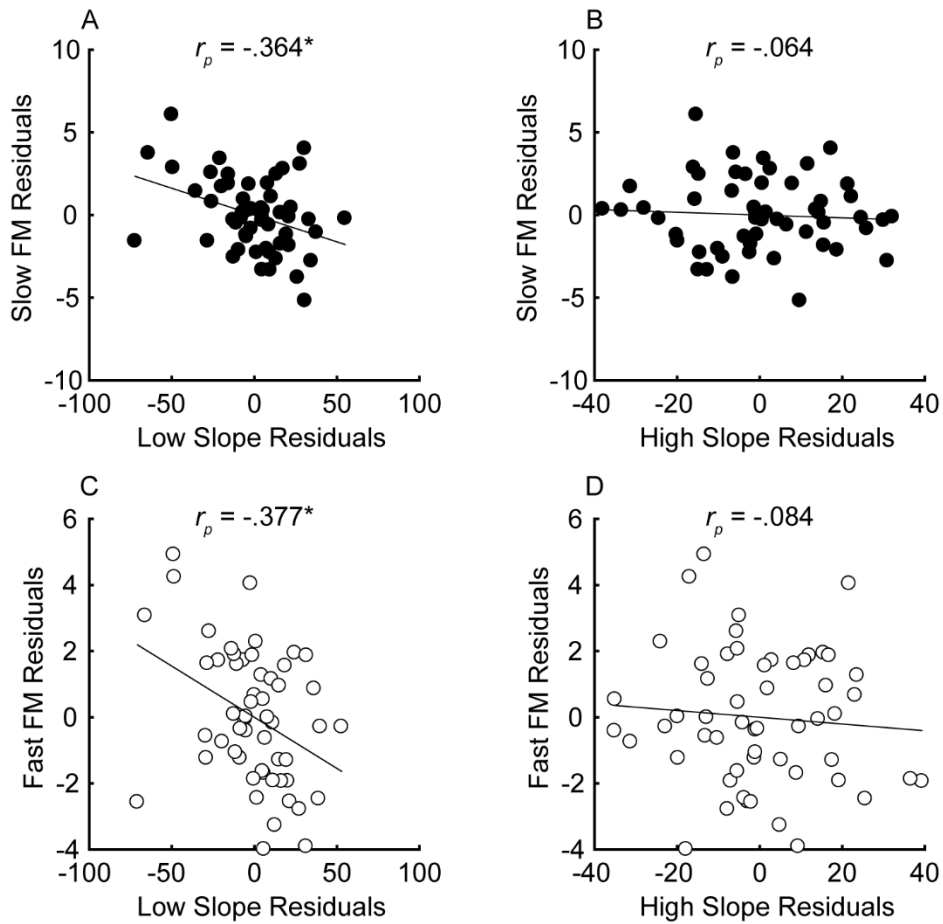

238

239 **Fig. 6.** Partial correlations between the steepness of the masking function slopes (x-axes) and FM  
240 detection (y-axes) after variance due to audibility, sensitivity to AM, and age has been partialled  
241 out for  $n=55$  participants. Units of the x- and y-axes are arbitrary because they correspond to the  
242 residual variance for slow ( $f_m = 1$  Hz; black) and fast FM detection ( $f_m = 20$  Hz; white).  
243 Correlations marked with an \* are significant after Holm's correction (\*\*\*\* $p < .0001$ , \*\*\* $p <$   
244  $.001$ , \*\* $p < .01$ , and \* $p < .05$ ).

245

## 246 **Discussion**

### 247 **A unitary code for FM**

248 Our finding that cochlear place coding is equally important for both slow- and fast-rate FM  
249 detection was unexpected. Humans' acute sensitivity to slow changes in frequency at carriers  
250 important for speech and music has been thought to result from precise neural synchronization to  
251 the temporal fine structure of the waveform (Demany and Semal, 1989; Moore and Sek, 1995,  
252 1996; Sek and Moore, 1995; Lacher-Fougère and Demany, 1998; Buss et al., 2004; Strelcyk and  
253 Dau, 2009). Multiple linear regression analyses showed that the combined effect of audibility,  
254 age, sensitivity to AM, and masking function slopes accounted for about 59.5% and 52.1% of the  
255 total variance in slow and fast FM detection thresholds, respectively. This is a high proportion of  
256 the variance, particularly considering the relatively rough behavioral approximation used to  
257 estimate cochlear tuning.

258 The clear role for place coding in slow FM is contrary to the widely accepted  
259 understanding that a time coding is used to detect FM at slow rates found in speech and music.  
260 Instead, our results provide evidence for a unitary code for two crucial features of natural sounds,  
261 AM and FM, that extends across the entire range of naturally encountered fluctuations rates. A  
262 unitary code for FM and AM at all rates may help account for the high-multicollinearity between  
263 FM and AM sensitivity observed here (Fig. 4) and in several previous studies with normal-  
264 hearing listeners (Whiteford and Oxenham, 2015; Otsuka et al., 2016; Paraouty and Lorenzi,  
265 2017; Whiteford et al., 2017).

266

### 267 **Implications for the perception and neural coding of complex tones**



268 This study used pure tones, which are not frequently encountered in the natural environment.  
269 However, combinations of pure tones form harmonic complex tones, such as musical instrument  
270 sounds, voiced speech, and many animal vocalizations. It is known that humans perceive the  
271 pitch of harmonic complex tones in ways that are fundamentally different from other commonly  
272 studied species, such as the chinchilla (Shofner and Chaney, 2013), ferret (Walker et al., 2018),  
273 or songbird (Bregman et al., 2016). Recent work (Shofner and Chaney, 2013; Walker et al.,  
274 2018) has suggested that part of this difference can be explained by the substantially sharper  
275 cochlear tuning found in humans than in smaller mammals (Shera et al., 2002, 2010; Sumner et  
276 al., 2018; Verschooten et al., 2018). Specifically, sharper human cochlear tuning is believed to  
277 explain why humans rely primarily on low-numbered spectrally resolved harmonics (Houtsma  
278 and Smurzynski, 1990; Bernstein and Oxenham, 2003), whereas smaller mammals, such as  
279 ferrets and chinchillas, rely on the cues in the temporal envelope provided by higher spectrally  
280 unresolved harmonics (Shofner and Chaney, 2013; Walker et al., 2018).

281 The present study extends these previous findings by suggesting that the resolved  
282 harmonics, which are most important for human pitch perception, may be represented by their  
283 place of stimulation in a way that depends of the lower (and steeper) slope of the excitation  
284 pattern, rather than just via the temporal fine structure information encoded via the stimulus-  
285 driven spike timing (phase locking) in response to resolved harmonics. This conclusion is  
286 consistent with other studies showing that pitch perception is possible even with spectrally  
287 resolved harmonics that are too high in frequency to elicit phase locking (Oxenham et al., 2011;  
288 Lau et al., 2017). In addition, the fact that timing fidelity in the human auditory nerve is no  
289 greater than that found in smaller mammals (Verschooten et al., 2018), supports our conclusion  
290 that differences in pitch perception between humans and other mammals cannot be ascribed to

291 differences in timing fidelity and phase locking, but instead may be due to differences in the  
292 sharpness of cochlear tuning.

293

### 294 **Alternative interpretations**

295 One alternative interpretation of our results is that hearing loss leads to a degradation in both  
296 spectral resolution and neural phase locking to temporal fine structure, and that it is the  
297 degradation in the phase locking, not cochlear filtering, that drives the relationship between  
298 spectral resolution and FM coding observed here. There are several reasons why this  
299 interpretation is unlikely. First, the literature on whether time coding degrades with SNHL,  
300 particularly for tones in quiet, is mixed. Physiological studies with non-human animals have  
301 generally found no effects (Harrison and Evans, 1979; Miller et al., 1997) or very small effects  
302 (Henry and Heinz, 2012) of SNHL on time coding, with the exception of one study (Woolf et al.,  
303 1981). Support from human studies are based on poorer behavioral performance in hearing-  
304 impaired listeners in tasks thought to use time coding (Lorenzi et al., 2006; Moore et al., 2006,  
305 2012, Hopkins and Moore, 2007, 2011; Moore, 2014; Füllgrabe and Moore, 2017). However,  
306 many of these tasks could also be affected by poorer cochlear tuning (Oxenham et al., 2009).  
307 Binaural tasks, involving the discrimination of interaural time differences (ITDs) in the temporal  
308 fine structure of stimuli, are likely to rely on phase-locked coding. These studies have not always  
309 found a clear relationship between ITD sensitivity and hearing loss, once effects of age and  
310 audibility are accounted for (Smoski and Trahiotis, 1986; Hopkins and Moore, 2011).

311 A second reason why it is unlikely for the role of place coding in FM to be a byproduct of  
312 time coding degrading with SNHL is that not all the listeners in the present study had SNHL, yet

313 the trends between FM and masking function slopes were maintained despite the inclusion of  
314 listeners with normal hearing.

315 Finally, the relationship between FM and the slopes of the masking function was specific  
316 to the low-frequency side of the masking function. Zwicker (1956) predicted over half a century  
317 ago that the steeper, low-frequency slope should play a larger role in FM-to-AM conversion. If  
318 the current findings were a spurious effect of time coding degrading with hearing loss, then the  
319 correlation should not be specific to the low-frequency slope, as the high-frequency slope is also  
320 strongly affected by hearing loss ( $r = .717, p < .0001$ ). For the sake of parsimony, it seems more  
321 reasonable to interpret the similar correlations between the lower masking slope and both slow  
322 and fast FM as reflecting the same coding mechanism than to interpret them as coming from  
323 different sources with a coincidentally similar correlation.

324

### 325 **Explaining superior FM perception at low rates within a unitary framework**

326 A pure cochlear place-based model for FM proposes that FM is transduced to AM through  
327 cochlear filtering (Zwicker, 1956). As the frequency sweeps across the tonotopic axis, the  
328 auditory system monitors changes in the output of the cochlear filters. For a place-only model to  
329 explain FM, it would need to account for the rate-dependent trends in FM and AM sensitivity  
330 observed here (Fig. 3) and in many previous studies (Viemeister, 1979; Sheft and Yost, 1990;  
331 Moore and Sek, 1995, 1996; Lacher-Fougère and Demany, 1998; Moore and Skrodzka, 2002;  
332 Whiteford and Oxenham, 2015, 2017; Whiteford et al., 2017). One possible explanation is that  
333 the central auditory system's ability to compare changes in the output between neighboring  
334 cochlear filters is more efficient at very slow rates. This interpretation is supported by a  
335 computational modeling study showing that frequency and intensity can be represented by a

336 single code, if inter-neuronal noise correlations (Cohen and Kohn, 2011) are taken into account  
337 (Micheyl et al., 2013). Such correlations would require relatively long time windows (and hence  
338 slow modulation rates) to play a functional role. Thus, such a code would function more  
339 efficiently at slow than at fast rates, producing the observed differential effect.

340         Alternatively, a combined place-time code may predict better sensitivity for slow, low-  
341 carrier FM relative to the same carrier at faster rates (Fig. 3) (Paraouty et al., 2018). Place-time  
342 models extract timing information in a way that is place dependent (Loeb et al., 1983; Shamma  
343 and Klein, 2000). There are various implementations, but place-time models generally rely on an  
344 array of coincidence detectors calculating the instantaneous cross-correlation between the phase-  
345 locked responses of auditory nerve fibers innervating different cochlear locations. Again, such a  
346 correlation mechanism would require a time window over which to evaluate the correlation, and  
347 so would predict poorer performance at fast FM rates than at slow FM rates. In addition, the poor  
348 frequency tuning that occurs with hearing loss affects the traveling wave response, thereby  
349 potentially disrupting this place-time relationship (Ruggero, 2013). A combined place-time code  
350 could therefore account for the correlation between slow-rate FM and the low slope of the  
351 masking function.

352

## 353 **Methods**

### 354 **Participants.**

355         Experimental tasks were carried out by 56 participants (19 male, 37 female; average age  
356 of 66.5 years, range: 19.4-78.5 years), with an average sensitivity to tones at 1 kHz of 36.5 dB  
357 SPL, ranging from -0.7 to 68.5 dB SPL based on Task 1. The participants had no reported history  
358 of cognitive impairment. Pure-tone audiometry was assessed at octave frequencies from 250-

359 8000 Hz. Nine participants had normal hearing, defined as audiometric thresholds  $\leq 20$  dB  
360 hearing level (HL) at 1 kHz in both ears. The other 47 participants had varying degrees of  
361 SNHL, with audiometric thresholds at 1 kHz poorer than 20 dB HL in at least one ear and air-  
362 bone gaps  $< 10$  dB to preclude a conductive hearing loss. Ears with SNHL  $\geq 70$  dB SPL from  
363 Task 1 were not included in the study. Participants with symmetric hearing ( $n = 37$ ; asymmetries  
364  $\leq 10$  dB at 1 kHz from Task 1) completed all monaural experimental tasks in their worse ear. Six  
365 participants had SNHL at 1 kHz in both ears, but loss in the poorer ear exceeded the study  
366 criterion; for these subjects, tasks were completed in the better ear only. One additional  
367 participant was only assessed in their better ear because loss in the poorer ear was near the study  
368 criterion (68.6 dB SPL at 1 kHz), and the subject indicated the level was uncomfortable. An  
369 additional three participants had one normal-hearing ear and one ear with SNHL at 1 kHz, and  
370 only measurements from the impaired ear were used in analyses. The final nine participants had  
371 asymmetric SNHL in both ears, defined as an asymmetry  $> 10$  dB on Task 1. For eight of these  
372 subjects, the experimental tasks were completed for both ears separately. One participant with  
373 asymmetric hearing only completed tasks in their poorer ear due to time constraints (Table 1).  
374 However, only performance in the poorer ear was used in the analyses for all nine of these  
375 listeners. Participants provided informed consent and were given monetary compensation for  
376 their time. The Institutional Review Board of the University of Minnesota approved all  
377 experimental protocols.

378 Table 1. Summary of participants.

| Measured Ear | # of Participants | Notes                                                                                                                                                                  |
|--------------|-------------------|------------------------------------------------------------------------------------------------------------------------------------------------------------------------|
| Worse ear    | 38                | Subjects with symmetric thresholds (asymmetry $\leq 10$ dB) from Task 1 ( $n=37$ ) or who could only be assessed in their worse ear due to time constraints ( $n=1$ ). |

|                                        |    |                                                                                                                                                                                                                                                                          |
|----------------------------------------|----|--------------------------------------------------------------------------------------------------------------------------------------------------------------------------------------------------------------------------------------------------------------------------|
| Better ear                             | 7  | Subjects with Task 1 thresholds in the worse ear that exceeded the study criterion (n=6) or indicated the SL for Task 2 in their worse ear was uncomfortable (n=1). Task 1 asymmetry > 10 dB; n=3 had normal hearing in their better ear, and n=8 had SNHL in both ears. |
| Both ears (worse ear used in analyses) | 11 |                                                                                                                                                                                                                                                                          |

---

379

380

### 381 **Stimuli.**

382 Stimuli were generated in Matlab (MathWorks) with a sampling rate of 48 kHz using a  
383 24-bit Lynx Studio L22 sound card and presented over Sennheiser HD650 headphones in a  
384 sound-attenuating chamber. Tasks were measured monaurally with threshold equalizing noise  
385 (TEN) (Moore et al., 2000) presented in the contralateral ear in order to prevent audible cross-  
386 talk between the two ears. The TEN was presented continuously in each trial, with the bandwidth  
387 spanning 1 octave, geometrically centered around the test frequency. Except for tasks that  
388 involved detection of a short (20 ms) tone pip, the TEN level (defined as the level with the  
389 auditory filter's equivalent rectangular bandwidth at 1 kHz) was always 25 dB below the target  
390 level, beginning 300 ms before the onset of the first interval and ending 200 ms after the offset of  
391 the second interval. Because less noise is needed to mask very short targets, the TEN was  
392 presented 35 dB below the target level for tasks that involved detection of a short, 20-ms tone pip  
393 (Tasks 4 and 7). This noise began 200 ms before the onset of the first interval and ended 100 ms  
394 after the offset of the second interval.

395 To obtain a more precise estimate of sensitivity for the test frequency, pure-tone absolute  
396 thresholds were measured for each ear at 1 kHz. The target was 500 ms in duration with 10-ms  
397 raised-cosine onset and offset ramps. The reference was 500 ms of silence, and the target and the  
398 reference were separated by a 400-ms interstimulus interval (ISI). Tasks involving modulation  
399 detection were assessed for the same frequency ( $f_c = 1$  kHz) at slow ( $f_m = 1$  Hz) and fast ( $f_m = 20$

400 Hz) rates. The target was an FM (Tasks 2 and 3) or AM (Task 4 and 5) pure tone while the  
401 reference was an unmodulated pure tone at 1 kHz. Both the target and the reference tones were 2  
402 s in duration with 50-ms raised-cosine onset and offset ramps. In the FM tasks, the starting phase  
403 of the modulator frequency was set so that the target always began with either an increase or  
404 decrease in frequency excursion from the carrier frequency, with 50% probability determined a  
405 priori. A similar manipulation was used for the AM tasks, so that the target always began at  
406 either the beginning or middle of a sinusoidal modulator cycle and so was either increasing or  
407 decreasing in amplitude at the onset. Stimuli for the modulation tasks were presented at 65 dB  
408 SPL or 20 dB sensation level (SL), whichever was greater, based on individualized absolute  
409 thresholds at 1 kHz from Task 1.

410         Detection for a short (20 ms), pure-tone pip was measured with and without the presence  
411 of a 1-kHz, 500-ms pure-tone forward masker. Tone-pip frequencies were 800, 860, 920, 980,  
412 1020, 1080, 1140, and 1200 Hz, and both the tone pip and the masker had 10-ms raised cosine  
413 onset and offset ramps. The tone pip was presented to one ear, directly following the offset of the  
414 masker, and the masker was presented to both ears to avoid potential confusion effects between  
415 the offset of the masker and the onset of the tone pip (Neff, 1986). The masker was fixed in level  
416 at either 65 dB SPL or 20 dB SL, whichever was greater, based on absolute thresholds for the  
417 500-ms test frequency in the target ear (Task 1). The starting level of the tone pip was always 10  
418 dB below the masker level in the masked condition. For unmasked thresholds, the starting level  
419 of the tone pip was either 40 dB SPL or 20 dB SL, whichever was greater, and the tone pip was  
420 preceded by 500 ms of silence.

421

422 **Procedure.**

423 Procedures were adapted from Whiteford et al. (2017) and are described in full below.

424 The experiment took place across 3-6 separate sessions, with each session lasting no longer than  
425 2 hours. All tasks were carried out using a two-interval, two-alternative forced-choice procedure  
426 with a 3-down 1-up adaptive method that tracks the 79.4% correct point of the psychometric  
427 function (Levitt, 1971). The target was presented in either the first or second interval with 50% a  
428 priori probability, and the participant's task was to click the virtual button on the computer  
429 screen (labeled "1" or "2") corresponding to the interval that contained the target. Each  
430 corresponding response button illuminated red during the presentation of the stimulus (either  
431 reference or target). Visual feedback ("Correct" or "Incorrect") was presented on the screen after  
432 each trial. All participants completed the tasks in the same order, and the tasks are described  
433 below in the order in which they were completed by the participants.

434

435 ***Task 1: Absolute Thresholds at 1 kHz.*** Participants were instructed to select the button on the  
436 computer screen that was illuminated while they heard a tone. The target was a 500-ms, 1-kHz  
437 pure tone presented to one ear, and the reference was 500 ms of silence. Three runs were  
438 measured for each ear, and the order of the presentation ear (left vs. right) was randomized  
439 across runs. Three participants were only assessed in their better ear, due to an extensive amount  
440 of hearing loss in the poorer ear according to their 1 kHz audiometric thresholds (all  $\geq$  80 dB  
441 HL). The remaining participants completed monaural absolute thresholds for both ears.

442 On the first trial, the target was presented at 40 dB SPL. The target changed by 8 dB for  
443 the first reversal, 4 dB for the next 2 reversals, and 2 dB for all following reversals. Absolute  
444 thresholds were determined by calculating the mean level at the final 6 reversal points. If the



445 standard deviation (SD) across the three runs was  $\geq 4$ , then 3 additional runs were conducted for  
446 the corresponding ear, and the first three runs were regarded as practice.

447  
448 **Tasks 2 and 3: FM Detection.** Participants were instructed to pick the tone that was “modulated”  
449 or “changing”. At the beginning of each run, the target had a peak-to-peak frequency excursion  
450 ( $2\Delta f$ ) of 5.02%. The  $2\Delta f$  varied by a factor of 2 for the first two reversal points, a factor of 1.4 for  
451 the third and fourth reversal points, and a factor of 1.19 for all following reversal points. The FM  
452 difference limen (FMDL) was defined as the geometric mean of  $2\Delta f$  at the final 6 reversal points.

453 Three runs were conducted for each modulation rate, and all three runs for slow-rate FM  
454 ( $f_m = 1$  Hz) were completed before fast-rate FM ( $f_m = 20$  Hz). Asymmetric participants with two  
455 qualifying ears completed six runs (three runs per ear) for each modulation rate, and the order of  
456 the presentation ear was randomized across runs. If the SD across the three runs for a given ear  
457 was  $\geq 4$ , the participant completed an additional three runs, and only the last three runs were  
458 used in analyses.

459  
460 **Task 4: Detection for 20-ms Tones.** Participants were instructed to select the button (labeled “1”  
461 or “2”) on the computer screen that was illuminated while they heard a short, 20-ms target tone  
462 pip. The target was presented at 40 dB SPL or 20 dB SL, whichever was greater, for the first trial  
463 of each run. The level of the target changed by 8 dB for the first two reversals, 4 dB for the  
464 following two reversals, and 2 dB for all following reversals. The absolute threshold was defined  
465 as the mean target level at the final six reversal points.

466 Participants completed one run for each of the eight tone-pip frequencies: 800, 860, 920,  
467 980, 1020, 1080, 1140, and 1200 Hz. The order of the tone-pip frequency conditions was

468 randomized across runs. Asymmetric participants with two qualifying ears had the order of the  
469 runs further blocked by presentation ear, so that 8 runs for the same ear had to be completed  
470 before any conditions in the opposite ear were measured. Whether the right or left ear was  
471 assessed first was randomized. One additional run was conducted for any conditions with an SD  
472  $\geq 4$  dB, and only the final run for each condition was used in analyses.

473  
474 **Tasks 5 and 6: AM Detection.** The instructions for AM detection were the same as the  
475 instructions for FM detection. The first trial of each run had a target with an AM depth of -7.96,  
476 in  $20\log(m)$  units. The target modulation depth changed by 6 dB for the first two reversals, 2 dB  
477 for the next two reversals, and 1 dB for all following reversals. The AM difference limen  
478 (AMDL) was defined as the mean modulation depth (in  $20\log(m)$ ) at the last 6 reversal points.

479 In the same manner as the FM tasks, all three runs for slow-rate AM ( $f_m = 1$  Hz) were  
480 completed before fast-rate AM ( $f_m = 20$  Hz). Asymmetric participants with two qualifying ears  
481 completed six runs (three runs per ear) for each modulation rate, and the order of the presentation  
482 ear was randomized across runs. If the SD across the first three runs for a given condition were  $\geq$   
483 4 dB, then three additional runs were conducted, and only the final three runs were analyzed.

484  
485 **Task 7: Forward Masking Patterns.** The task was to determine which of two tones was followed  
486 by a short, 20-ms tone pip. Two runs were measured for each of the eight tone-pip frequencies  
487 (800, 860, 920, 980, 1020, 1080, 1140, and 1200 Hz), for a total of 16 runs, and the order of the  
488 tone-pip condition was randomized across runs. Asymmetric participants with two qualifying  
489 ears had the order of the runs further blocked by presentation ear, so that 8 runs for the same ear  
490 had to be completed before any conditions in the opposite ear were presented. The 1-kHz, 500-

491 ms masker tones were fixed in frequency and level, presented binaurally at 65 dB SPL or 20 dB  
492 SL based on absolute thresholds from Task 1, whichever was greater. Within a trial, each masker  
493 was either directly followed by a 20-ms tone pip, presented monaurally to the target ear, or 20-  
494 ms of silence. The starting level of the tone pip was 10 dB below the masker level in the  
495 corresponding ear. The level of the tone pip changed by 8 dB for the first two reversals, 4 dB for  
496 the third and fourth reversals, and 2 dB for the following reversals. The masked threshold for  
497 each tone-pip frequency condition was calculated as the mean tone-pip level at the final 6  
498 reversal points. For a given subject, if the SD of the masked threshold across the two runs was  $\geq$   
499 4 dB, then the subject completed two additional runs for the corresponding tone-pip frequency.  
500 For these conditions, only the final two runs were used in analyses, and the first two runs were  
501 regarded as practice. The average across the final two runs for each tone-pip frequency was used  
502 in analyses.

503  
504 **Sample size.** Because the strength of the relationship between FM sensitivity and forward  
505 masking slopes was unknown in listeners varying in degree of SNHL, and the number of people  
506 with SNHL at 1 kHz was expected to be limited, we set a minimum sample size requirement for  
507 SNHL subjects based on the smallest effect we would like to be able to detect. To detect a  
508 moderate correlation between masking function slopes and FM sensitivity ( $r = .4$ ,  $\alpha = .05$ ,  
509 one-tailed test) with a power of .9, we needed a sample of  $n=47$ . We also aimed to recruit an  
510 additional 10 participants with NH at 1 kHz of similar age to the SNHL subjects. The NH sample  
511 was limited to 10 people to ensure a relatively even distribution of absolute thresholds at 1 kHz.  
512 One of these anticipated NH subjects had mild SNHL at 1 kHz in their worse ear, leading to a  
513 sample size of  $n=57$ , with  $n=9$  NH listeners and  $n=48$  SNHL. One SNHL subject reported a

514 history of neurological issues and was excluded from the study. Another SNHL subject had  
515 unusually poor FM sensitivity at both rates, with thresholds greater than 3 SD from the group  
516 mean. This outlier was excluded from all analyses, leading to a final sample size of  $n=55$ .  
517 Including the outlier in all analyses generally did not affect the results (Supplementary Text 2,  
518 Supplementary Table 1, and Supplementary Figs. 2-3).

519  
520 **Statistical analyses.** The mean log-transformed thresholds ( $10\log_{10}(2\Delta f(\%))$  and  $20\log_{10}(m)$ )  
521 were used in all analyses to better approximate normality, where  $2\Delta f(\%)$  is the peak-to-peak  
522 frequency excursion (for FM) as a percentage of the carrier frequency, and  $m$  is the modulation  
523 index (for AM). All reported means ( $\bar{x}$ ) and standard deviations ( $s$ ) correspond to the log-  
524 transformed data. Confidence intervals (CIs) are 95% CIs. Pearson correlations were used to  
525 assess continuous trends; the corresponding  $p$  values were adjusted using Holm's method to  
526 correct for family-wise error rate (Holm, 1979). The  $p$  values corresponding to the correlations in  
527 Fig. 1 were corrected for 2 comparisons, 4 comparisons for Fig. 3 (all FM and AM correlations),  
528 and 8 comparisons for Figs. 4 and 5 (all FM correlations with masking function slopes). The  
529 masking function slopes and AM correlations were corrected for 4 comparisons. Paired-samples  
530 t-tests were used to assess rate-dependent differences, and effect sizes were calculated using  
531 Cohen's  $d_z$  (Lakens, 2013). The cocor package was used to calculate significant differences  
532 between correlations using Steiger's modification (Steiger, 1980; Diedenhofen and Musch,  
533 2015). All tests were one-tailed unless otherwise stated in the results.

534 Bootstrap analyses were conducted to estimate the highest possible correlation detectable  
535 for each modulation task and the forward masking task, in order to ensure that correlations with  
536 these measures were not limited by test-retest reliability. For each subject and for each

537 modulation condition, performance was simulated by randomly sampling 6 runs (3 test and 3  
538 retest) from a normal distribution based on the individual means and standard deviations from  
539 the corresponding task. An analogous procedure was conducted for each individual's masked  
540 thresholds for every tone-pip condition, with 4 runs (2 test and 2 retest) sampled from each  
541 individualized normal distribution. The average simulated runs were used to estimate the low and  
542 high frequency slopes of the masking function by calculating a linear regression between the 4  
543 lowest and 4 highest tone-pip frequency conditions for the average test and the average retest  
544 runs (4 regressions per iteration). Simulated test-retest correlations were calculated using the  
545 simulated slopes for  $n=55$  subjects (for forward masking) or the simulated average test and retest  
546 thresholds for each subject (for the modulated tasks). This process was repeated for 100,000  
547 iterations. The correlations were transformed using Fisher's  $r$  to  $z$  transformation, averaged, and  
548 then transformed back to  $r$ , yielding an average test-retest correlation whose maximum is limited  
549 by within-subject error.

550

551 **Data availability.** The data that support the findings will be available in the Data Repository for  
552 U of M.

553

#### 554 **Acknowledgements**

555 Supported by Grant R01 DC005216 from the National Institutes of Health (to A.J.O.) and an Eva  
556 O. Miller Fellowship (to K.L.W.).

557

#### 558 **Author contributions**

559 KLW and AJO conceived of and designed the experiment; HAK and KLW collected the data;  
560 KLW analyzed the data; KLW and AJO wrote the paper.

561

562 **Competing interests:** The authors declare that no competing interests exist.

563

## 564 **References**

565 Attias H, Schreiner CE (1997) Temporal low-order statistics of natural sounds. *Adv Neural Inf*  
566 *Process Syst* 9:27–33.

567 Bernstein JG, Oxenham AJ (2003) Pitch discrimination of diotic and dichotic tone complexes:  
568 Harmonic resolvability or harmonic number? *J Acoust Soc Am* 113:3323–3334.

569 Bregman MR, Patel AD, Gentner TQ (2016) Songbirds use spectral shape, not pitch, for sound  
570 pattern recognition. *Proc Natl Acad Sci* 113:1666–1671.

571 Buss E, Hall JW, Grose JH (2004) Temporal fine-structure cues to speech and pure tone  
572 modulation in observers with sensorineural hearing loss. *Ear Hear* 25:242–250.

573 Chen H, Zeng F-G (2004) Frequency modulation detection in cochlear implant subjects. *J*  
574 *Acoust Soc Am* 116:2269–2277.

575 Cohen MR, Kohn A (2011) Measuring and interpreting neuronal correlations. *Nat Neurosci*  
576 14:811–819.

577 Deal JA, Betz J, Yaffe K, Harris T, Purchase-Helzner E, Satterfield S, Pratt S, Govil N,  
578 Simonsick EM, Lin FR (2017) Hearing impairment and incident dementia and cognitive  
579 decline in older adults: The Health ABC Study. *Journals Gerontol Ser A Biol Sci Med Sci*  
580 72:703–709.

- 581 Demany L, Semal C (1989) Detection thresholds for sinusoidal frequency modulation. *J Acoust*  
582 *Soc Am* 85:1295–1301.
- 583 Diedenhofen B, Musch J (2015) cocor: A comprehensive solution for the statistical comparison  
584 of correlations Olivier J, ed. *PLoS One* 10:e0121945.
- 585 Ewert SD, Paraouty N, Lorenzi C (2018) A two-path model of auditory modulation detection  
586 using temporal fine structure and envelope cues. *Eur J Neurosci*:1–14.
- 587 Füllgrabe C, Moore BCJ (2017) Evaluation of a method for determining binaural sensitivity to  
588 temporal fine structure (TFS-AF test) for older listeners with normal and impaired low-  
589 frequency hearing. *Trends Hear* 21:1–14.
- 590 Glasberg BR, Moore BCJ (1986) Auditory filter shapes in subjects with unilateral and bilateral  
591 cochlear impairments. *J Acoust Soc Am* 79:1020–1033.
- 592 Grose JH, Mamo SK (2012) Frequency modulation detection as a measure of temporal  
593 processing: Age-related monaural and binaural effects. *Hear Res* 294:49–54.
- 594 Grothe B, Pecka M, McAlpine D (2010) Mechanisms of sound localization in mammals. *Physiol*  
595 *Rev* 90:983–1012.
- 596 Harrison R V, Evans EF (1979) Some aspects of temporal coding by single cochlear fibres from  
597 regions of cochlear hair cell degeneration in the guinea pig. *Arch Otorhinolaryngol* 224:71–  
598 78.
- 599 He N, Mills JH, Dubno JR (2007) Frequency modulation detection: Effects of age,  
600 psychophysical method, and modulation waveform. *J Acoust Soc Am* 122:467–477.
- 601 Heinz MG, Colburn HS, Carney LH (2001) Evaluating auditory performance limits: i. one-

- 602 parameter discrimination using a computational model for the auditory nerve. *Neural*  
603 *Comput* 13:2273–2316.
- 604 Henry KS, Heinz MG (2012) Diminished temporal coding with sensorineural hearing loss  
605 emerges in background noise. *Nat Neurosci* 15:1362–1364.
- 606 Holm S (1979) A simple sequentially rejective multiple test procedure. *Scand J Stat* 6:65–70.
- 607 Hopkins K, Moore BCJ (2007) Moderate cochlear hearing loss leads to a reduced ability to use  
608 temporal fine structure information. *J Acoust Soc Am* 122:1055–1068.
- 609 Hopkins K, Moore BCJ (2011) The effects of age and cochlear hearing loss on temporal fine  
610 structure sensitivity, frequency selectivity, and speech reception in noise. *J Acoust Soc Am*  
611 130:334–349.
- 612 Houtsma AJM, Smurzynski J (1990) Pitch identification and discrimination for complex tones  
613 with many harmonics. *J Acoust Soc Am* 87:304.
- 614 Ives DT, Calcutt A, Kalluri S, Strelcyk O, Sheft S, Lorenzi C (2013) Effects of noise reduction  
615 on AM and FM perception. *J Assoc Res Otolaryngol* 14:149–157.
- 616 Joris PX, Schreiner CE, Rees A (2004) Neural processing of amplitude-modulated sounds.  
617 *Physiol Rev* 84:541–577.
- 618 Lacher-Fougère S, Demany L (1998) Modulation detection by normal and hearing-impaired  
619 listeners. *Audiology* 37:109–121.
- 620 Lakens D (2013) Calculating and reporting effect sizes to facilitate cumulative science: A  
621 practical primer for t-tests and ANOVAs. *Front Psychol* 4:1–12.
- 622 Lau BK, Mehta AH, Oxenham AJ (2017) Superoptimal perceptual integration suggests a place-



- 623 based representation of pitch at high frequencies. *J Neurosci* 37:9013–9021.
- 624 Levitt H (1971) Transformed up-down methods in psychoacoustics. *J Acoust Soc Am* 49:467–  
625 477.
- 626 Liberman CM, Dodds LW, Learson DA (1986) Structure-Function Correlation in Noise-  
627 Damaged Ears: A Light and Electron-Microscopic Study. In: *Basic and Applied Aspects of*  
628 *Noise-Induced Hearing Loss* (Salvi RJ, Henderson D, Hamernik RP, Colletti V, eds), pp  
629 163–177. Boston, MA: Springer US.
- 630 Lin FR, Albert M (2014) Hearing loss and dementia – who is listening? *Aging Ment Health*  
631 18:671–673.
- 632 Lin FR, Metter EJ, O’Brien RJ, Resnick SM, Zonderman AB, Ferrucci L (2011) Hearing loss  
633 and incident dementia. *Arch Neurol* 68:214–220.
- 634 Lin FR, Yaffe K, Xia J, Xue Q-L, Harris TB, Purchase-Helzner E, Satterfield S, Ayonayon HN,  
635 Ferrucci L, Simonsick EM (2013) Hearing loss and cognitive decline in older adults. *JAMA*  
636 *Intern Med* 173:293.
- 637 Loeb GE, White MW, Merzenich MM (1983) Spatial cross-correlation. *Biol Cybern* 47:149–  
638 163.
- 639 Lorenzi C, Gilbert G, Carn H, Garnier S, Moore BCJ (2006) Speech perception problems of the  
640 hearing impaired reflect inability to use temporal fine structure. *Proc Natl Acad Sci*  
641 103:18866–18869.
- 642 Micheyl C, Schrater PR, Oxenham AJ (2013) Auditory frequency and intensity discrimination  
643 explained using a cortical population rate code. *PLoS Comput Biol* 9:e1003336.

- 644 Miller RL, Schilling JR, Franck KR, Young ED (1997) Effects of acoustic trauma on the  
645 representation of the vowel /ε/ in cat auditory nerve fibers. *J Acoust Soc Am* 101:3602–  
646 3616.
- 647 Moiseff A, Konishi M (1981) Neuronal and behavioral sensitivity to binaural time differences in  
648 the owl. *J Neurosci* 1:40–48.
- 649 Moore BCJ (2007) *Cochlear Hearing Loss: Physiological, Psychological and Technical Issues*,  
650 Second Edi. John Wiley & Sons.
- 651 Moore BCJ (2014) *Auditory Processing of Temporal Fine Structure: Effects of Age and Hearing*  
652 *Loss*.
- 653 Moore BCJ, Glasberg BR, Hopkins K (2006) Frequency discrimination of complex tones by  
654 hearing-impaired subjects: Evidence for loss of ability to use temporal fine structure. *Hear*  
655 *Res* 222:16–27.
- 656 Moore BCJ, Glasberg BR, Stoev M, Füllgrabe C, Hopkins K (2012) The influence of age and  
657 high-frequency hearing loss on sensitivity to temporal fine structure at low frequencies (L).  
658 *J Acoust Soc Am* 131:1003.
- 659 Moore BCJ, Huss M, Vickers DA, Glasberg BR, Alcántara JI (2000) A test for the diagnosis of  
660 dead regions in the cochlea. *Br J Audiol* 34:205–224.
- 661 Moore BCJ, Sek A (1995) Effects of carrier frequency, modulation rate, and modulation  
662 waveform on the detection of modulation and the discrimination of modulation type  
663 (amplitude modulation versus frequency modulation). *J Acoust Soc Am* 97:2468–2478.
- 664 Moore BCJ, Sek A (1996) Detection of frequency modulation at low modulation rates: Evidence

- 665 for a mechanism based on phase locking. *J Acoust Soc Am* 100:2320–2331.
- 666 Moore BCJ, Skrodzka E (2002) Detection of frequency modulation by hearing-impaired  
667 listeners: Effects of carrier frequency, modulation rate, and added amplitude modulation. *J*  
668 *Acoust Soc Am* 111:327–335.
- 669 Moore BCJ, Vickers DA, Plack CJ, Oxenham AJ (1999) Inter-relationship between different  
670 psychoacoustic measures assumed to be related to the cochlear active mechanism. *J Acoust*  
671 *Soc Am* 106:2761–2778.
- 672 Neff DL (1986) Confusion effects with sinusoidal and narrow-band noise forward maskers. *J*  
673 *Acoust Soc Am* 79:1519–1529.
- 674 Nelken I, Rotman Y, Yosef OB (1999) Responses of auditory-cortex neurons to structural  
675 features of natural sounds. *Nature* 397:154–157.
- 676 Otsuka S, Furukawa S, Yamagishi S, Hirota K, Kashino M (2016) Relation between cochlear  
677 mechanics and performance of temporal fine structure-based tasks. *J Assoc Res Otolaryngol*  
678 17:541–557.
- 679 Oxenham AJ, Micheyl C, Keebler M V (2009) Can temporal fine structure represent the  
680 fundamental frequency of unresolved harmonics? *J Acoust Soc Am* 125:2189–2199.
- 681 Oxenham AJ, Micheyl C, Keebler M V, Loper A, Santurette S (2011) Pitch perception beyond  
682 the traditional existence region of pitch. *Proc Natl Acad Sci U S A* 108:7629–7634.
- 683 Paraouty N, Ewert SD, Wallaert N, Lorenzi C (2016) Interactions between amplitude modulation  
684 and frequency modulation processing: Effects of age and hearing loss. *J Acoust Soc Am*  
685 140:121–131.

- 686 Paraouty N, Lorenzi C (2017) Using individual differences to assess modulation-processing  
687 mechanisms and age effects. *Hear Res* 344:38–49.
- 688 Paraouty N, Stasiak A, Lorenzi C, Varnet L, Winter IM (2018) Dual coding of frequency  
689 modulation in the ventral cochlear nucleus. *J Neurosci* 38:4123–4137.
- 690 Robertson D, Manley GA (1974) Manipulation of frequency analysis in the cochlear ganglion of  
691 the guinea pig. *J Comp Physiol* 91:363–375.
- 692 Ruggero MA (2013) Cochlear delays and the traveling waves: Comments on “experimental look  
693 at cochlear mechanics.” *Audiology* 33:131–142.
- 694 Saberi K, Hafter ER (1995) A common neural code for frequency- and amplitude-modulated  
695 sounds. *Nature* 374:537–539.
- 696 Schreiner CE, Langner G (1988) Coding of temporal patterns in the central auditory nervous  
697 system. In: *Auditory Function: Neurobiological Basis of Hearing* (Edelman GM, Gall WE,  
698 Cowan WM, eds), pp 337–361. New York: John Wiley & Sons.
- 699 Sek A, Moore BCJ (1995) Frequency discrimination as a function of frequency, measured in  
700 several ways. *J Acoust Soc Am* 97:2479–2486.
- 701 Shamma S, Klein D (2000) The case of the missing pitch templates: How harmonic templates  
702 emerge in the early auditory system. *J Acoust Soc Am* 107:2631–2644.
- 703 Shannon R V, Zeng F-G, Kamath V, Wygonski J, Ekelid M (1995) Speech recognition with  
704 primarily temporal cues. *Science* (80- ) 270:303–304.
- 705 Sheft S, Shafiro V, Lorenzi C, McMullen R, Farrell C (2012) Effects of age and hearing loss on  
706 the relationship between discrimination of stochastic frequency modulation and speech

- 707 perception. *Ear Hear* 33:709–720.
- 708 Sheft S, Yost WA (1990) Temporal integration in amplitude modulation detection. *J Acoust Soc*  
709 *Am* 88:796–805.
- 710 Shera CA, Guinan JJ, Oxenham AJ (2002) Revised estimates of human cochlear tuning from  
711 otoacoustic and behavioral measurements. *Proc Natl Acad Sci U S A* 99:3318–3323.
- 712 Shera CA, Guinan JJ, Oxenham AJ (2010) Otoacoustic estimation of cochlear tuning: Validation  
713 in the chinchilla. *J Assoc Res Otolaryngol* 11:343–365.
- 714 Shofner WP, Chaney M (2013) Processing pitch in a nonhuman mammal (*Chinchilla laniger*). *J*  
715 *Comp Psychol* 127:142–153.
- 716 Siebert WM (1970) Frequency discrimination in the auditory system: Place or periodicity  
717 mechanisms? *Proc IEEE* 58:723–730.
- 718 Smith ZM, Delgutte B, Oxenham AJ (2002) Chimaeric sounds reveal dichotomies in auditory  
719 perception. *Nature* 416:87–90.
- 720 Smoski WJ, Trahiotis C (1986) Discrimination of interaural temporal disparities by normal-  
721 hearing listeners and listeners with high-frequency sensorineural hearing loss. *J Acoust Soc*  
722 *Am* 79:1541–1547.
- 723 Steiger JH (1980) Tests for comparing elements of a correlation matrix. *Psychol Bull* 87:245–  
724 251.
- 725 Strelcyk O, Dau T (2009) Relations between frequency selectivity, temporal fine-structure  
726 processing, and speech reception in impaired hearing. *J Acoust Soc Am* 125:3328–3345.
- 727 Sumner CJ, Wells TT, Bergevin C, Sollini J, Kreft HA, Palmer AR, Oxenham AJ, Shera CA

- 728 (2018) Mammalian behavior and physiology converge to confirm sharper cochlear tuning in  
729 humans. *Proc Natl Acad Sci*:1–5.
- 730 Thomson RS, Auduong P, Miller AT, Gurgel RK (2017) Hearing loss as a risk factor for  
731 dementia: A systematic review. *Laryngoscope Investig Otolaryngol* 2:69–79.
- 732 Verschooten E, Desloovere C, Joris PX (2018) High-resolution frequency tuning but not  
733 temporal coding in the human cochlea. *PLOS Biol* 16:e2005164.
- 734 Viemeister NF (1979) Temporal modulation transfer functions based upon modulation  
735 thresholds. *J Acoust Soc Am* 66:1364–1380.
- 736 Walker KMM, Gonzalez R, Kang J, McDermott JH, King AJ (2018) Pitch perception is adapted  
737 to species-specific cochlear filtering. *bioRxiv*.
- 738 Wallaert N, Moore BCJ, Lorenzi C (2016) Comparing the effects of age on amplitude  
739 modulation and frequency modulation detection. *J Acoust Soc Am* 139:3088–3096.
- 740 Wang X, Lu T, Bendor D, Bartlett E (2008) Neural coding of temporal information in auditory  
741 thalamus and cortex. *Neuroscience* 157:484–493.
- 742 Whiteford KL, Kreft HA, Oxenham AJ (2017) Assessing the role of place and timing cues in  
743 coding frequency and amplitude modulation as a function of age. *J Assoc Res Otolaryngol*  
744 18:619–633.
- 745 Whiteford KL, Oxenham AJ (2015) Using individual differences to test the role of temporal and  
746 place cues in coding frequency modulation. *J Acoust Soc Am* 138:3093–3104.
- 747 Whiteford KL, Oxenham AJ (2017) Auditory deficits in amusia extend beyond poor pitch  
748 perception. *Neuropsychologia* 99:213–224.

- 749 Woolf NK, Ryan AF, Bone RC (1981) Neural phase-locking properties in the absence of  
750 cochlear outer hair cells. *Hear Res* 4:335–346.
- 751 Zeng F-G, Nie K, Stickney GS, Kong Y-Y, Vongphoe M, Bhargave A, Wei C, Cao K (2005)  
752 Speech recognition with amplitude and frequency modulations. *Proc Natl Acad Sci*  
753 102:2293–2298.
- 754 Zurek PM, Formby C (1981) Frequency-discrimination ability of hearing-impaired listeners. *J*  
755 *Speech Lang Hear Res* 24:108.
- 756 Zwicker E (1956) Die elementaren Grundlagen zur Bestimmung der Informationskapazität des  
757 Gehörs. *Acustica* 6:365–381.
- 758
